# Supplementary material for: Synthesis and fine-tuning the pore properties of a thiophene based porous organic framework by post-oxidation treatment
Source: Royal Society of Chemistry journal article supplement (doi:10.1039/c9ta07193h), 2019-01-01
Supplement: c9ta07193h1.pdf [file c9ta07193h1.pdf]

## Electronic Supplementary Information

### Synthesis and Fine-Tuning the Pore Properties of a Thiophene Based Porous Organic Framework by the Post-Oxidation

Yanze Liu,<sup>#a</sup> Yiming Zuo,<sup>#a</sup> Shuai Li,<sup>a</sup> Jiani Li,<sup>a</sup> Li Li,<sup>a</sup> Caixia Liu,<sup>a</sup> Shumalia Ashraf,<sup>a</sup>  
Pengfei Li,<sup>\*ab</sup> and Bo Wang<sup>\*bc</sup>

- Advanced Research Institute of Multidisciplinary Science, Beijing Institute of Technology, Beijing, 100081, China.
- Key Laboratory of Cluster Science Ministry of Education, Beijing Key Laboratory of Photoelectronic/Electrophotonic, School of Chemistry and Chemical Engineering, Beijing Institute of Technology, Beijing 100081, China.
- Department of Chemistry, Tsinghua University, Beijing, 100084, China.

E-mail: lipengfei@bit.edu.cn and bowang@bit.edu.cn

#### Contents:

| Section |                                                                         | Page  |
|---------|-------------------------------------------------------------------------|-------|
| 1       | Synthetic procedures                                                    | 2-3   |
| 2       | <sup>1</sup> H NMR and <sup>13</sup> C NMR spectra                      | 4-5   |
| 3       | FT-IR spectra                                                           | 6     |
| 4       | Powder X-ray diffraction                                                | 6     |
| 5       | Scanning electron micrographs (SEM)                                     | 7     |
| 6       | Thermogravimetric analysis (TGA)                                        | 7-9   |
| 7       | CO <sub>2</sub> /NH <sub>3</sub> /N <sub>2</sub> Gas adsorption studies | 10-12 |
| 8       | Proton conductivity comparison                                          | 13    |
| 9       | References                                                              | 14    |

## 1. Synthetic Procedures

All chemicals and solvents were purchased from J&K Scientific Co. Ltd., Innochem Co. Ltd. and Aladdin Reagent Co., Ltd. They were directly used without further purification unless otherwise noted.

### 1.1 Synthesis of tetrakis(4-bromophenyl)methane (Br<sub>4</sub>TPM)

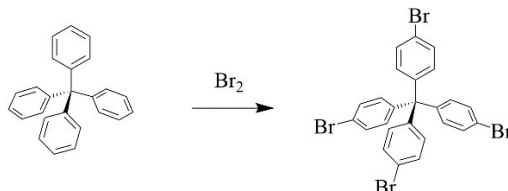

**Scheme S1.** Synthesis of tetrakis(4-bromophenyl)methane (Br<sub>4</sub>TPM)

Br<sub>4</sub>TPM was prepared according to the literature.<sup>[1]</sup> At 0 °C, the liquid bromine (3.2 mL, 63.0 mmol) was added carefully to a 100 mL 2-neck round-bottom flask containing tetraphenylmethane (1.0 g, 3.1 mmol). The reaction mixture was stirred for 3 h at room temperature. When finished, it was cooled to -78 °C by an ice/acetone bath. Ethanol (40 mL) was added slowly, and the resulting mixture was allowed to warm to room temperature overnight. Then aqueous solution of saturated Na<sub>2</sub>S<sub>2</sub>O<sub>3</sub> was added cautiously to remove the excess bromine until the orange color disappeared. The precipitate was collected, washed with plenty of water and ethanol. Further purification by recrystallization from chloroform/ethanol (V:V = 2:1) afforded a white solid. Then dried by vacuum at 100 °C for 12 h. Yield: 1.68 g (2.64 mmol, 85%). <sup>1</sup>H NMR (400 MHz, CDCl<sub>3</sub>) δ (ppm): 7.39 (d, *J* = 8.0 Hz, 8H); 7.01 (d, *J* = 8.0 Hz, 8H). <sup>13</sup>C NMR (100 MHz, CDCl<sub>3</sub>) δ (ppm): 144.42, 132.35, 131.08, 120.80, 63.63.

### 1.2 Synthesis of 2,5-Bis(trimethylstannyl) thiophene (BTSTP).

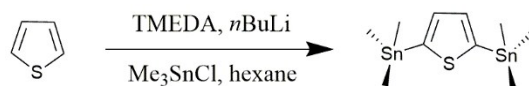

**Scheme S2.** Synthesis of 2,5-Bis(trimethylstannyl) thiophene (BTSTP)

2,5-Bis(trimethylstannyl)thiophene was prepared according to the literature.<sup>[2]</sup> *n*-butyl lithium (8.0 mL, 20.0 mmol, 2.5 M in *n*-hexane) was added dropwise carefully to the solution of 3.0 mL (20.0 mmol) of TMEDA (Tetramethylethylenediamine), 2.3 mL (10 mmol) of thiophene, and 30 mL of hexane at 0 °C under N<sub>2</sub>. Then the mixture was

heated at reflux for 1h, and slowly cooled to 0 °C, followed by the addition of 4 g (20.0 mmol) trimethyltin chloride in 20 mL of anhydrous hexane. The reaction mixture was warmed to room temperature and stirred for 24 h. The reaction mixture was quenched with water, extracted with hexane and washed with distilled water for several times. The organic phase was collected and dried over anhydrous Na<sub>2</sub>SO<sub>4</sub>, and the solvents were removed under reduced pressure to obtain a white solid. Recrystallization from ethanol afforded the target compound. Yield: 3.42 g (8.35 mmol, 83%). <sup>1</sup>H NMR (400 MHz, *d*<sub>6</sub>-DMSO)  $\delta$  (ppm): 7.34 (s, 2H), 0.32 (s, 18H). <sup>13</sup>C NMR (100 MHz, *d*<sub>6</sub>-DMSO)  $\delta$  (ppm): 143.25, 136.39, -7.34.

## 2. $^1\text{H}$ NMR and $^{13}\text{C}$ NMR Spectra

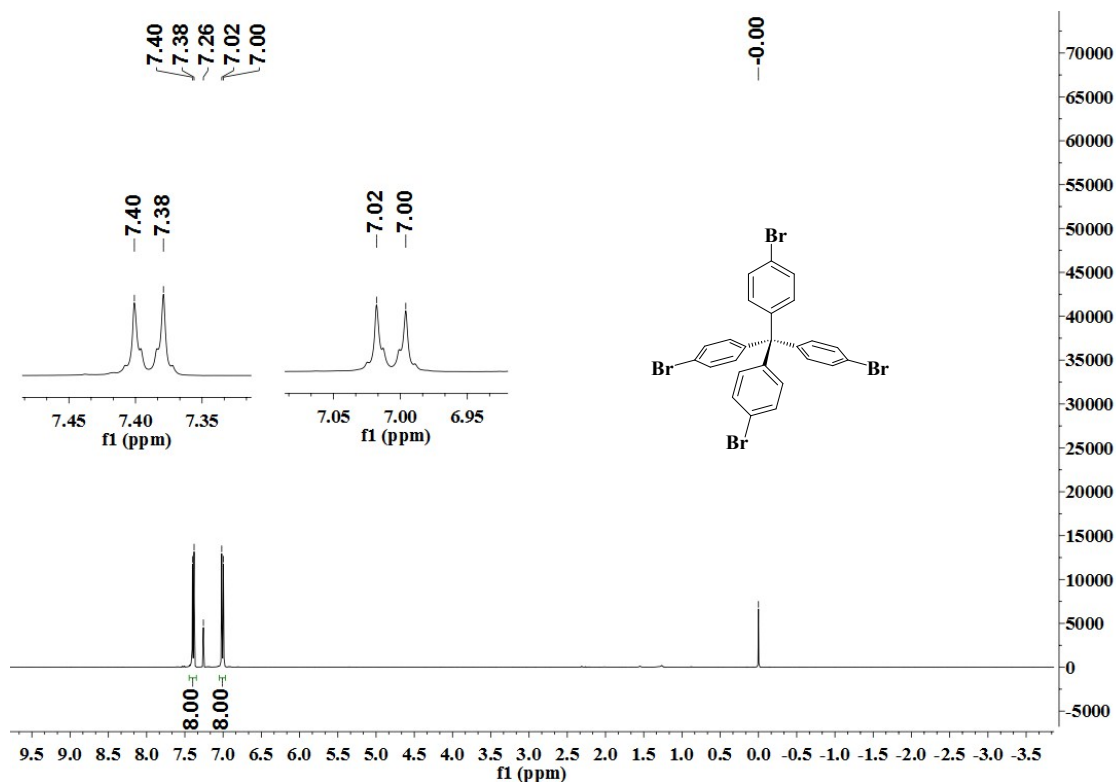

Fig. S1.  $^1\text{H}$  NMR of  $\text{Br}_4\text{TPM}$  ( $\text{CDCl}_3$ , 400 MHz).

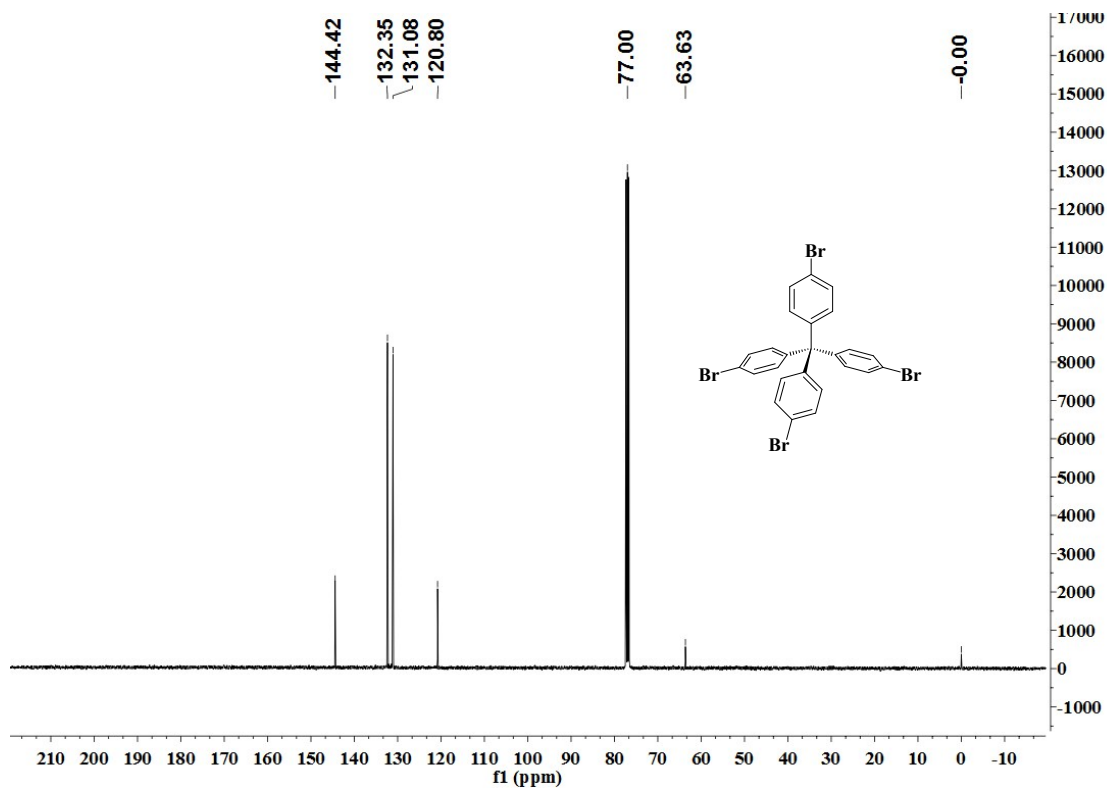

Fig. S2.  $^{13}\text{C}$  NMR of  $\text{Br}_4\text{TPM}$  ( $\text{CDCl}_3$ , 100 MHz).

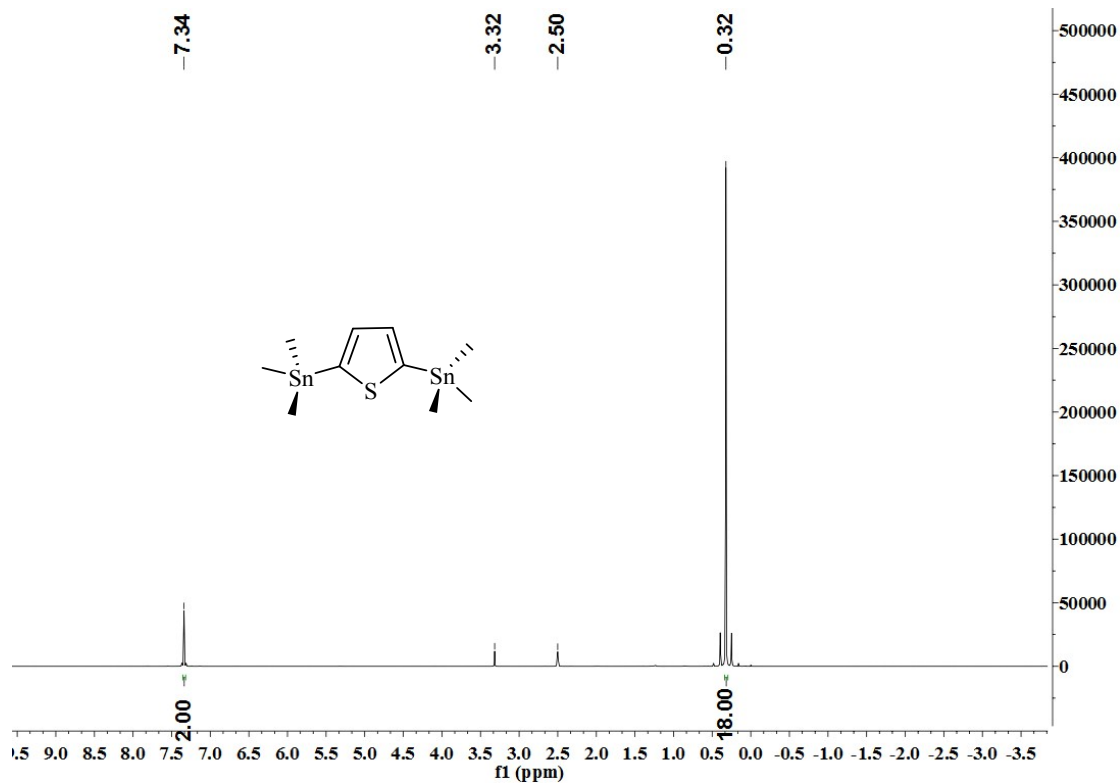

**Fig. S3.**  $^1\text{H}$  NMR of BTSTP ( $d_6$ -DMSO, 400 MHz).

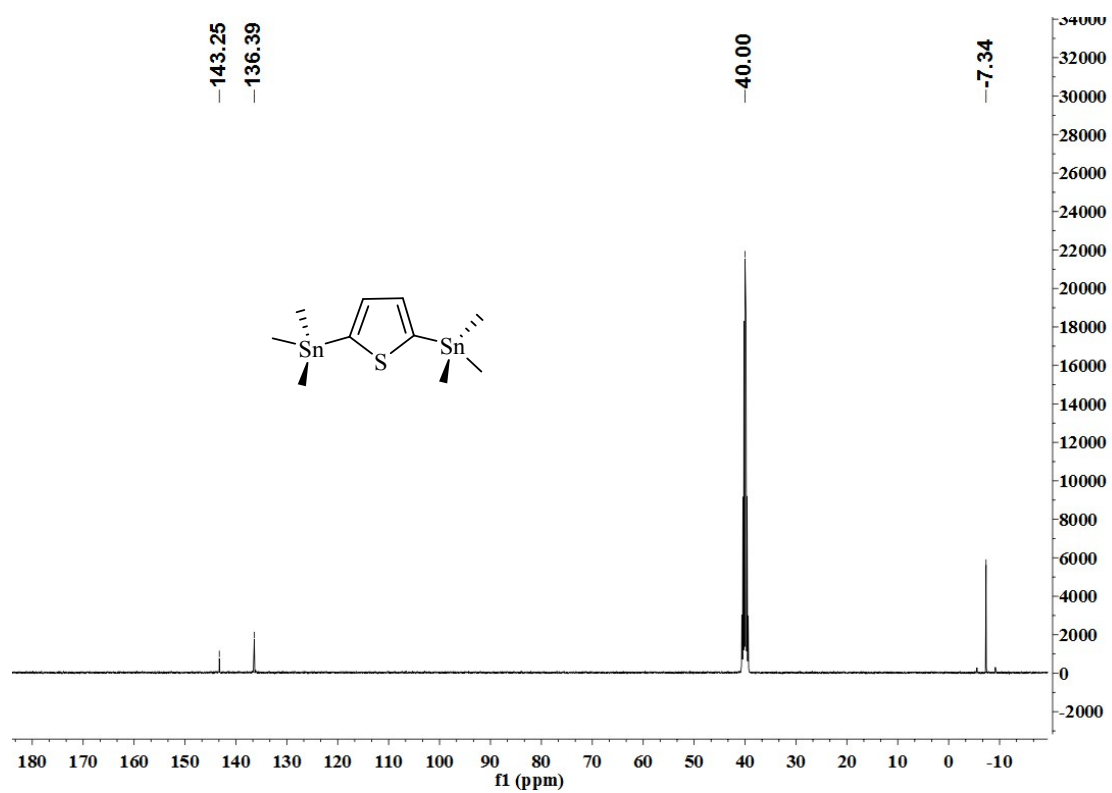

**Fig. S4.**  $^{13}\text{C}$  NMR of BTSTP ( $d_6$ -DMSO, 100 MHz).

### 3. FT-IR Spectra

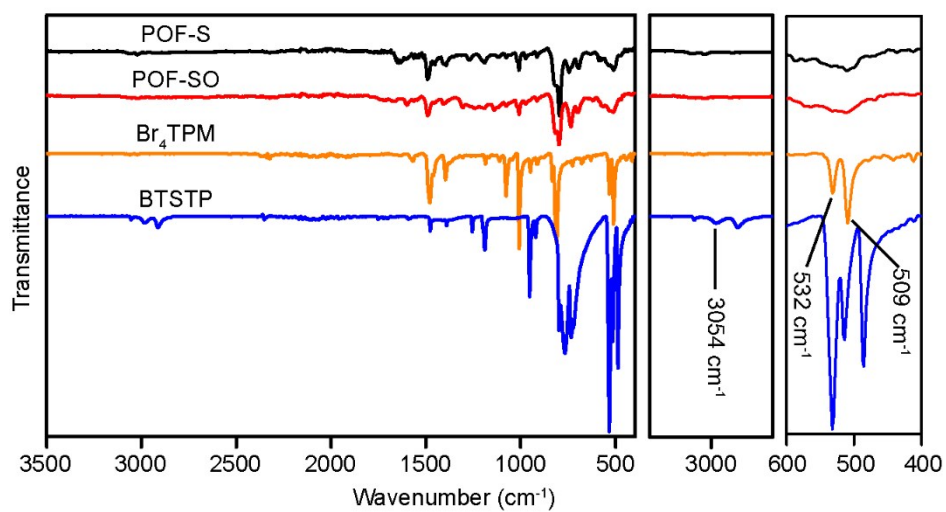

**Fig. S5.** FT-IR spectra comparison of Br<sub>4</sub>TPM, BTSTP, POF-S and POF-SO(1.0).

### 4. Powder X-Ray Diffraction (PXRD)

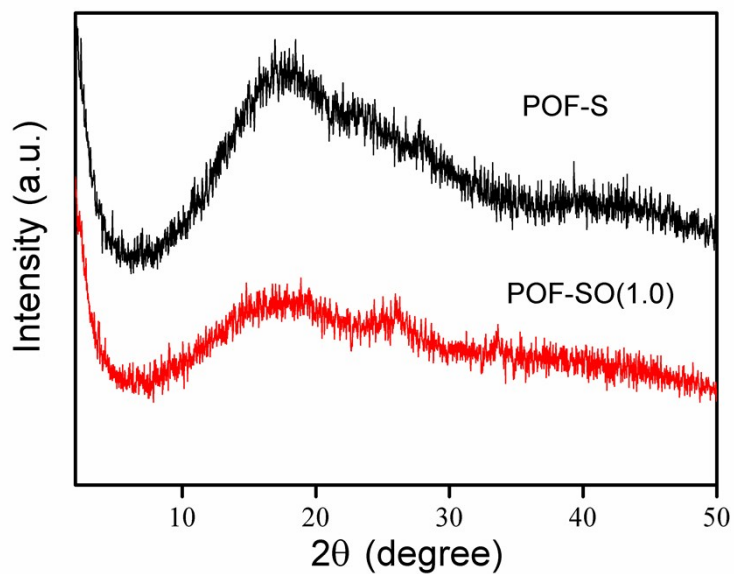

**Fig. S6.** PXRD pattern of POF-S and POF-SO(1.0).

## 5. Scanning Electron Micrographs (SEM)

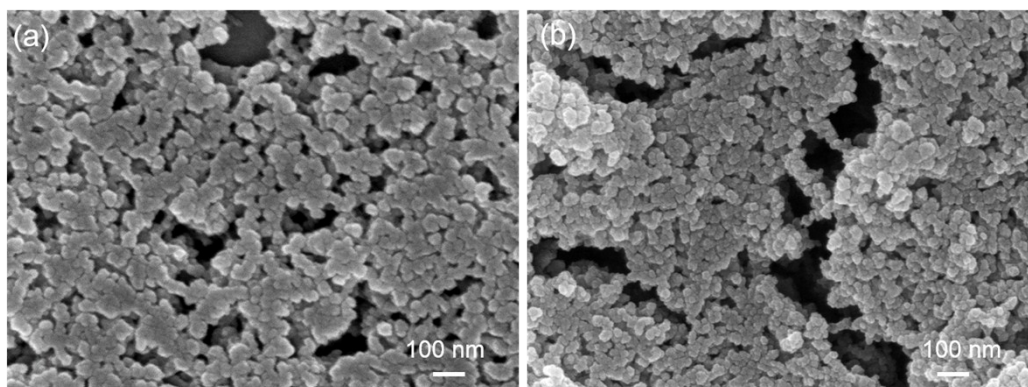

**Fig. S7.** SEM images of POF-S (a) and POF-SO(1.0) (b).

## 6. Thermogravimetric Analysis (TGA)

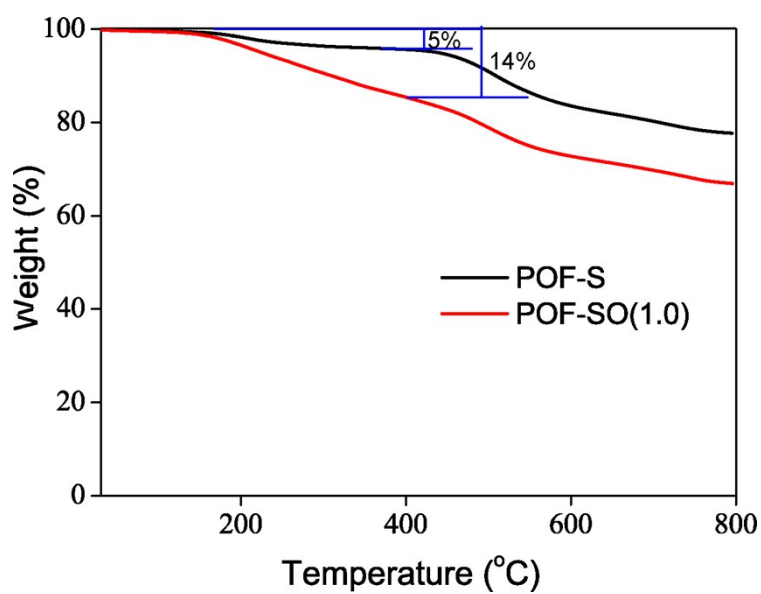

**Fig. S8.** TGA of POF-S and POF-SO (1.0) under N<sub>2</sub> atmosphere.

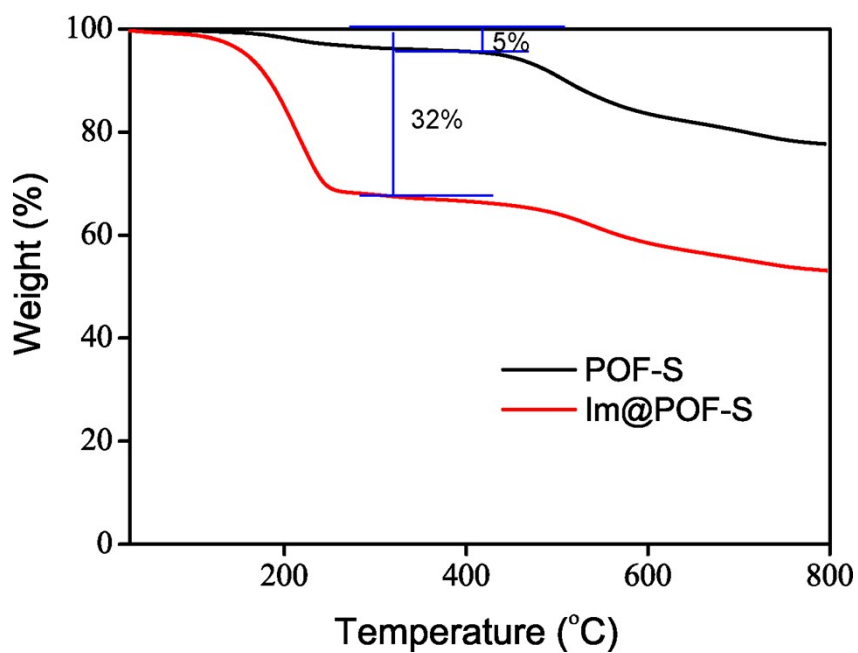

**Fig. S9.** TGA data of Im@POF-S under N<sub>2</sub> atmosphere.

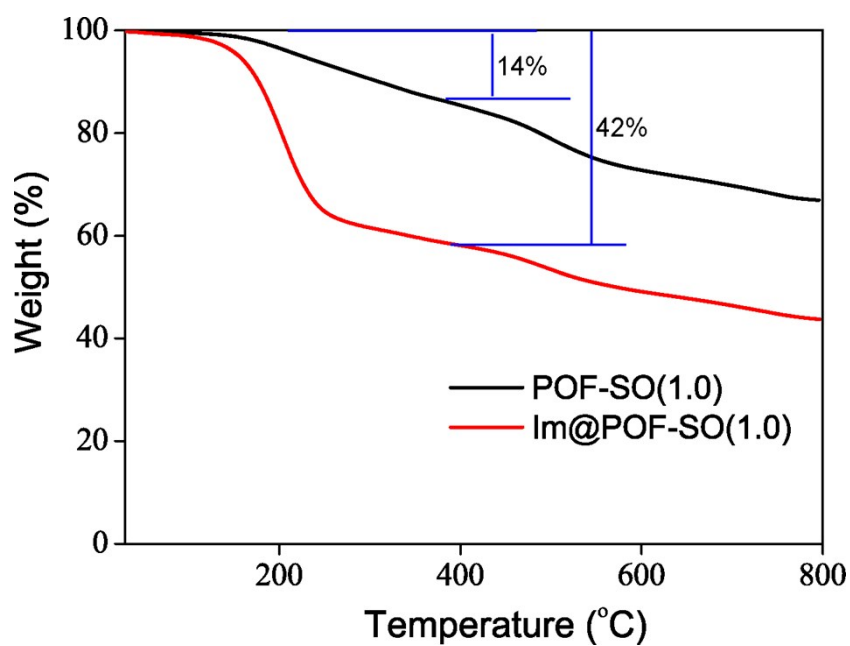

**Fig. S10.** TGA data of Im@POF-SO (1.0) under N<sub>2</sub> atmosphere.



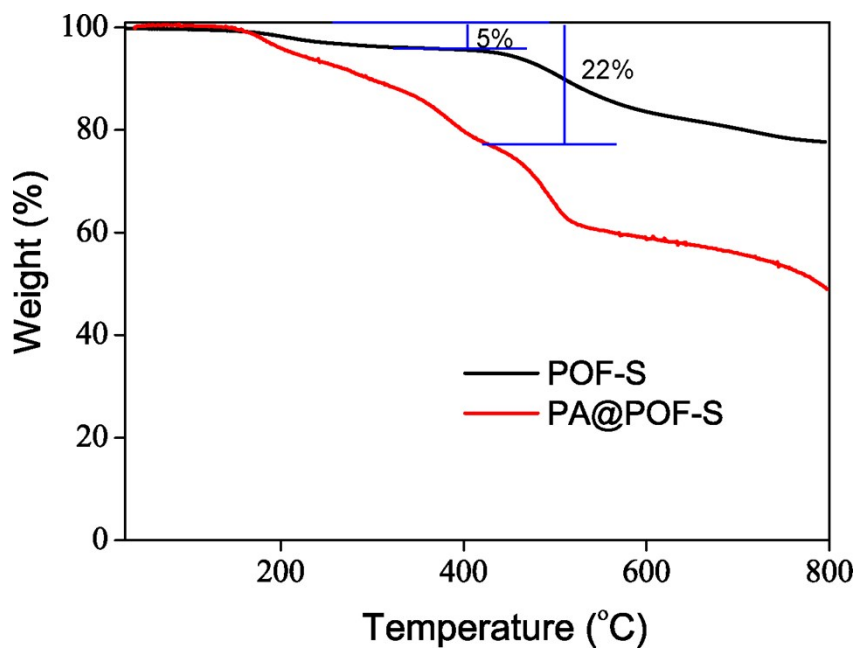

**Fig. S11.** TGA data of PA@POF-S under N<sub>2</sub> atmosphere.

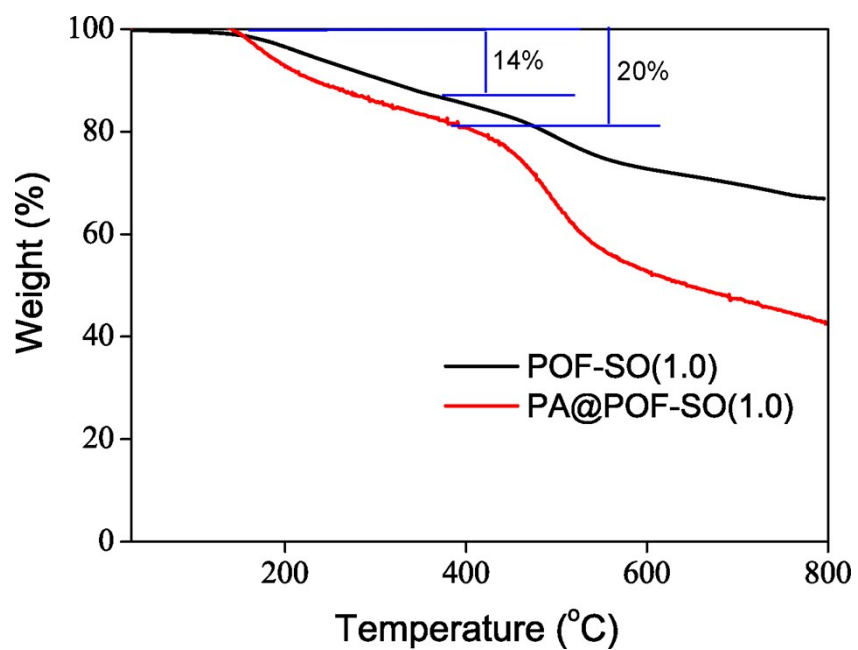

**Fig. S12.** TGA data of PA@POF-SO (1.0) under N<sub>2</sub> atmosphere.

## 7. Gas Adsorption Studies

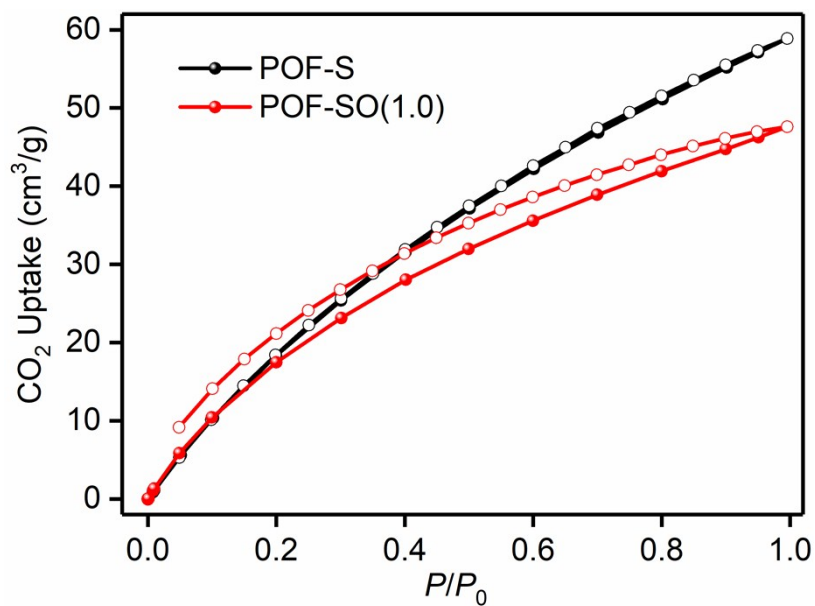

**Fig. S13.** CO<sub>2</sub> adsorption isotherms of POF-S and POF-SO(1.0) at 273K.

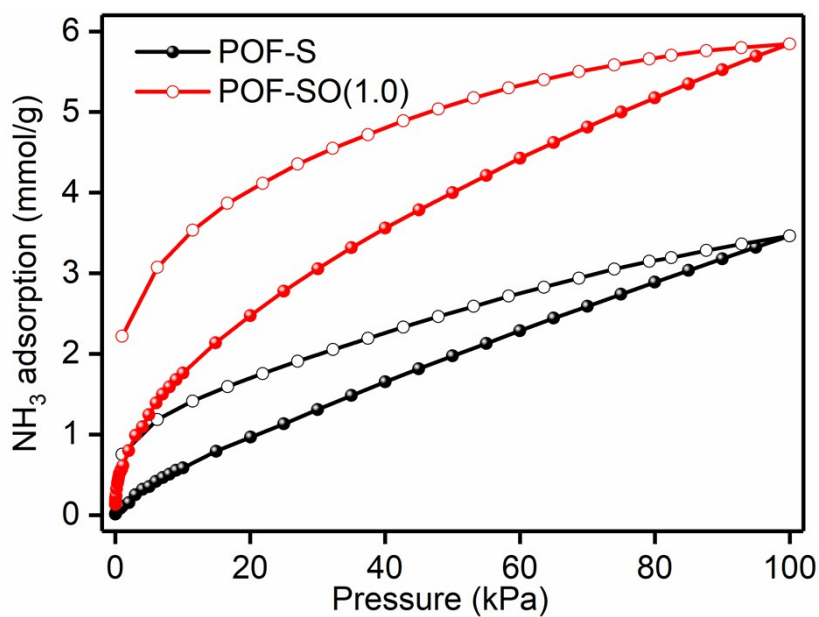

**Fig. S14.** NH<sub>3</sub> adsorption isotherms of POF-S and POF-SO (1.0) at 298K.

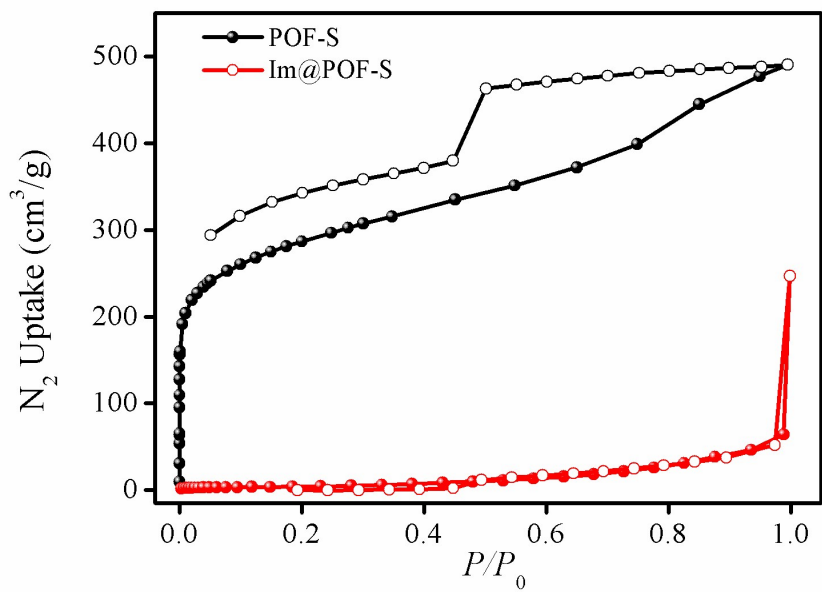

**Fig. S15.** N<sub>2</sub> adsorption isotherms of POF-S and Im@POF-S at 77K.

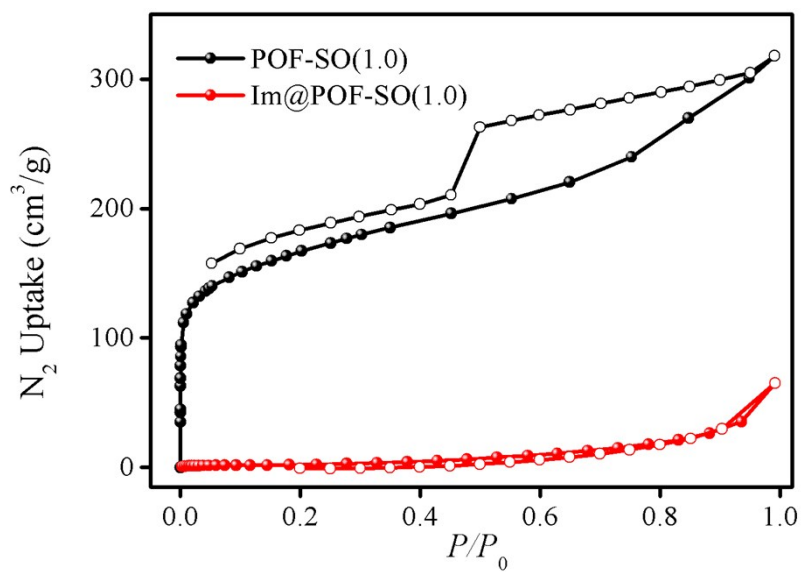

**Fig. S16.** N<sub>2</sub> adsorption isotherms of POF-SO(1.0) and Im@POF-SO(1.0) at 77K.

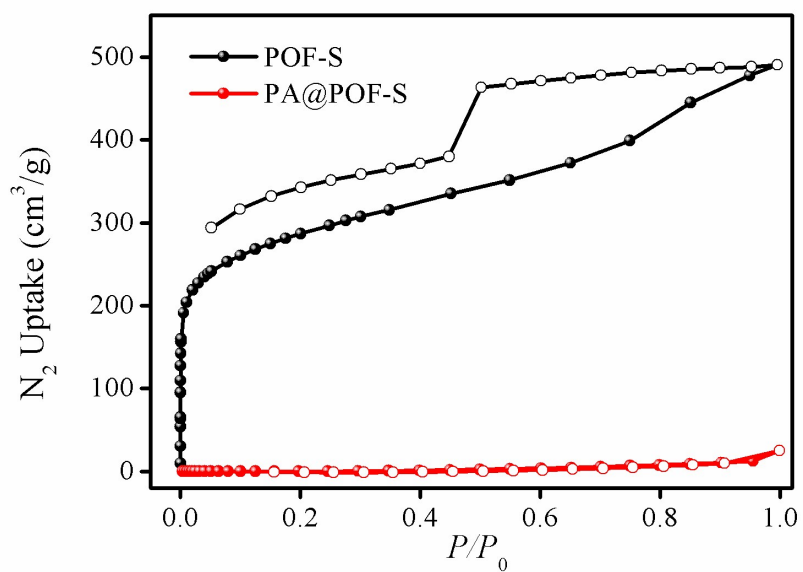

**Fig. S17.** N<sub>2</sub> adsorption isotherms of POF-S and PA@POF-S at 77K.

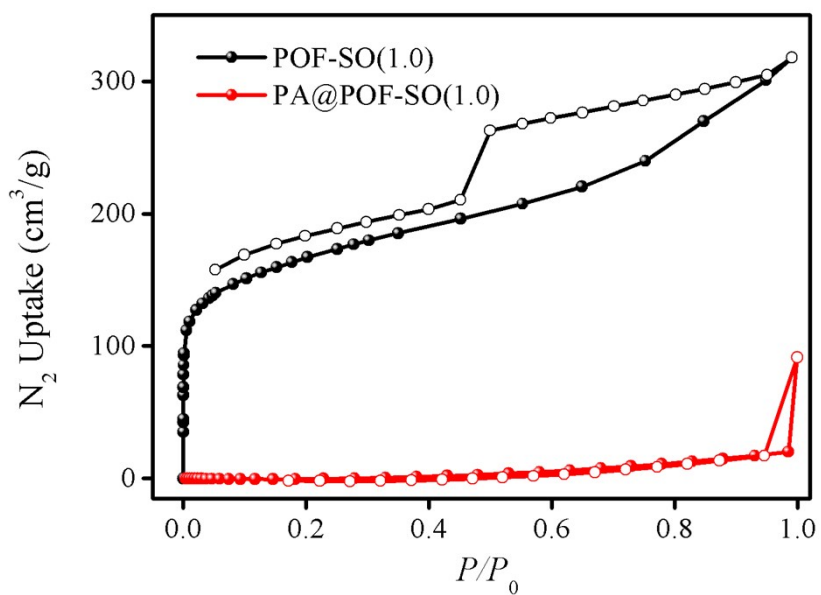

**Fig. S18.** N<sub>2</sub> adsorption isotherms of POF-SO(1.0) and PA@POF-SO(1.0) at 77K.

## 8. Proton conductivity comparison

**Table S1: Comparison of the anhydrous proton conductivity of porous materials**

|   | Compound Name                                                                      | Conductivity (S cm <sup>-1</sup> ) | Ea(eV) | Temperature | References                                        |
|---|------------------------------------------------------------------------------------|------------------------------------|--------|-------------|---------------------------------------------------|
| 1 | $\beta$ -PCMOF2(Tz) <sub>0.3</sub>                                                 | $2 \times 10^{-4}$                 | 0.51   | 150 °C      | Nat. Chem., <b>2009</b> , 1, 705–710              |
| 2 | [Al( $\mu_2$ -OH)(1,4-ndc)] <sub>n</sub> ⊃Im                                       | $2.2 \times 10^{-5}$               | 0.6    | 120 °C      | Nat. Mater., <b>2009</b> , 8, 831–836             |
|   | [Al( $\mu_2$ -OH)(1,4-bdc)] <sub>n</sub> ⊃Im                                       | $1.0 \times 10^{-7}$               | 0.9    |             |                                                   |
| 3 | PA@MIL-101                                                                         | $3 \times 10^{-3}$                 | 0.42   | 150 °C      | J. Am. Chem. Soc., <b>2012</b> , 134, 15640–15643 |
| 4 | [Zn(H <sub>2</sub> PO <sub>4</sub> ) <sub>2</sub> (Tz) <sub>2</sub> ] <sub>n</sub> | $1.1 \times 10^{-4}$               | 0.6    | 130 °C      | J. Am. Chem. Soc., <b>2012</b> , 134, 12780–12785 |
| 5 | PA@Tp-Azo                                                                          | $6.7 \times 10^{-5}$               | 0.11   | 67 °C       | J. Am. Chem. Soc., <b>2014</b> , 136, 6570–6573   |
| 6 | Im@Td-PNDI                                                                         | $9.04 \times 10^{-5}$              | 0.33   | 120 °C      | J. Am. Chem. Soc., <b>2015</b> , 137, 913–918     |
|   | Im@Td-PPI                                                                          | $3.49 \times 10^{-4}$              | 0.30   |             |                                                   |
| 7 | Im@TPB-DMTP-COF                                                                    | $3.78 \times 10^{-3}$              | 0.21   | 120 °C      | Nat. Mater., <b>2016</b> , 15, 722–726            |
|   | Tz@TPB-DMTPCOF                                                                     | $9.60 \times 10^{-4}$              | 0.25   |             |                                                   |
| 8 | PON-1                                                                              | $5.2 \times 10^{-4}$               | 0.39   | 130 °C      | J. Mater. Chem. A, <b>2018</b> , 6, 21542–21549   |
|   | PON-2                                                                              | $7.3 \times 10^{-5}$               | 0.39   |             |                                                   |
|   | PON-3                                                                              | $2.1 \times 10^{-7}$               | 0.53   |             |                                                   |
|   | PON-4                                                                              | $9.7 \times 10^{-6}$               | 0.58   |             |                                                   |
|   | PON-5                                                                              | $2.0 \times 10^{-5}$               | 0.35   |             |                                                   |
|   | PON-6                                                                              | $4.9 \times 10^{-6}$               | 0.44   |             |                                                   |
| 9 | Im@POF-SO(1.0)                                                                     | $1.3 \times 10^{-3}$               | 0.37   | 120 °C      | <b>This work</b>                                  |
|   | PA@POF-SO(1.0)                                                                     | $2.6 \times 10^{-3}$               | 0.20   |             |                                                   |

Note: PA = H<sub>3</sub>PO<sub>4</sub>, Im = Imidazole, Tz = *IH*-1,2,4-triazole

## 9. References:

1. R. Rathore, C. L. Burns, M. I. Deselnicu, *Org. Lett.*, 2001, **3**, 2887–2890.
2. J. Liu, E. N. Kadnikova, Y. Liu, M. D. McGehee, J. M. J. Fréchet, *J. Am. Chem. Soc.*, 2004, **126**, 9486–9487.
